# Supplementary material for: Proteomic Analysis of Excretory-Secretory Products of Mesocestoides corti Metacestodes Reveals Potential Suppressors of Dendritic Cell Functions
Source: PLoS Negl Trop Dis. 2016 Oct 13;10(10):e0005061. doi: 10.1371/journal.pntd.0005061 (PMC5063416; doi:10.1371/journal.pntd.0005061)
Supplement: S2 Table — (XLSX) [file pntd.0005061.s004.xlsx]

## Sheet: Tabelle1
Table S2. Proteins exclusively detected in somatic extracts from M. corti tetrathyridia but not in ES products.
Protein name	Accession numbers1	Molecular weight	Somatic extracts2
			Rep1	Rep2	Rep3
1,4-alpha-glucan-branching enzyme	MCOS_0000027001-mRNA-1	82 kDa	0.0056047	0.0080201	0.0033324
14-3-3 protein zeta	MCOS_0000697401-mRNA-1	28 kDa	0	0.028083	0.010796
2-amino-3-ketobutyrate coenzyme A ligase, mitochondrial	MCOS_0000103701-mRNA-1	45 kDa	0.0078436	0.0096833	0
2-oxoglutarate dehydrogenase, mitochondrial	MCOS_0000410601-mRNA-1	114 kDa	0.003529	0.003921	0.0036269
40S ribosomal protein SA	MCOS_0000947501-mRNA-1	30 kDa	0.0039362	0.0060742	0.0036776
6-phosphogluconate dehydrogenase, decarboxylating	MCOS_0000418901-mRNA-1	18 kDa	0	0.02814	0.0081131
78 kDa glucose-regulated protein	MCOS_0000201301-mRNA-1	72 kDa	0.0043882	0.0060947	0
Adenosylhomocysteinase	MCOS_0000093801-mRNA-1	48 kDa	0	0.0046277	0.0070046
Aldo-keto reductase family 1 member C-like protein 1	MCOS_0000140201-mRNA-1	34 kDa	0.018977	0.018669	0.019947
Alpha crystallin/Hsp20 domain; HSP20-like chaperone domain-containing protein	MCOS_0000336901-mRNA-1	36 kDa	0.082746	0.057724	0.10273
ATP synthase subunit alpha, mitochondrial	MCOS_0000115501-mRNA-1	57 kDa	0.02871	0.026583	0.017883
ATP synthase subunit beta, mitochondrial	MCOS_0000758701-mRNA-1	23 kDa	0.061869	0.058793	0.044115
Calcium-binding protein, putative	MCOS_0000937701-mRNA-1	34 kDa	0.00952	0.011018	0.010007
Calcyphosine/tpp, putative	MCOS_0000023001-mRNA-1	24 kDa	0.04133	0.041457	0.043442
Calreticulin	MCOS_0000976001-mRNA-1	49 kDa	0.016896	0.029724	0.017365
cAMP-dependent protein kinase type II regulatory subunit	MCOS_0000381501-mRNA-1	42 kDa	0.011712	0.033436	0.015502
Cat eye syndrome critical region protein 5	MCOS_0000591701-mRNA-1	50 kDa	0.0056856	0.0090246	0.0053121
Cation-transporting P-type ATPase, N-terminal domain; P-type ATPase, A domain-containing protein	MCOS_0000468301-mRNA-1	25 kDa	0.050717	0.06457	0.037021
Chaperonin Cpn60 family; Chaperonin Cpn60/TCP-1 family; GroEL-like apical domain; GroEL-like equatorial domain-containing protein	MCOS_0000019701-mRNA-1	64 kDa	0.023597	0.020728	0.013002
Cuticle collagen 14	MCOS_0000193201-mRNA-1	216 kDa	0.0072796	0.004902	0.0061832
Dihydrolipoyl dehydrogenase, mitochondrial	MCOS_0000677201-mRNA-1	51 kDa	0.02383	0.030338	0.020177
Domain of unknown function DUF3421 domain-containing protein	MCOS_0000373501-mRNA-1	29 kDa	0.0066578	0.0098633	0.0024882
Dynein light chain, type 1/2 family-containing protein	MCOS_0000443801-mRNA-1	10 kDa	0.068418	0.040991	0.048884
EF-hand domain; EF-hand domain pair-containing protein	MCOS_0000824801-mRNA-1	19 kDa	0.019075	0.011775	0.033665
Elongation factor, GTP-binding domain; Translation elongation factor EFTu/EF1A, C-terminal domain; Translation elongation factor EFTu/EF1A, domain 2; Translation elongation factor EF1A, eukaryotic/archaeal family; Translation protein, beta-barrel domain; Translation elongation factor EF1A/initiation factor IF2gamma, C-terminal domain; P-loop containing nucleoside triphosphate hydrolase domain-con…	MCOS_0000362201-mRNA-1	49 kDa	0.040776	0.043677	0.036604
Family S33 non-peptidase homologue	MCOS_0000716301-mRNA-1	40 kDa	0.035019	0.037983	0.036458
Fatty acid binding protein, putative	MCOS_0000263001-mRNA-1	16 kDa	0.019899	0.020728	0.030213
Fructose-1,6-bisphosphatase	MCOS_0000855701-mRNA-1	37 kDa	0.0074846	0.00495	0.015984
Glucose-6-phosphate 1-dehydrogenase	MCOS_0000154101-mRNA-1	57 kDa	0.005138	0.0054369	0.0061721
Glucose-6-phosphate isomerase	MCOS_0000032101-mRNA-1	62 kDa	0.014276	0.010815	0.010307
Glutamate dehydrogenase, mitochondrial	MCOS_0000731901-mRNA-1	58 kDa	0.05677	0.075091	0.067565
Glutathione S-transferase, C-terminal domain; Glutathione S-transferase, C-terminal-like domain-containing protein	MCOS_0000453001-mRNA-1	15 kDa	0.016922	0.026114	0.028987
Glutathione S-transferase, N-terminal domain; Glutathione S-transferase, C-terminal domain; Glutathione S-transferase, C-terminal-like domain; Thioredoxin-like fold domain-containing protein	MCOS_0000437101-mRNA-1	18 kDa	0.03194	0.029574	0.023448
Glycogen debranching enzyme	MCOS_0001023101-mRNA-1	96 kDa	0.010461	0.012398	0.011338
Glycogen debranching enzyme	MCOS_0000358101-mRNA-1	107 kDa	0.0068444	0.01021	0.0056843
Glycogen phosphorylase	MCOS_0000092401-mRNA-1	8 kDa	0.08428	0.092668	0.073823
Glycogenin-related	MCOS_0000688501-mRNA-1	38 kDa	0.063396	0.031306	0.038501
Glycoside hydrolase, family 3, N-terminal domain; Glycoside hydrolase family 3 C-terminal domain; Glycoside hydrolase, superfamily domain; Fibronectin type III-like domain-containing protein	MCOS_0000816301-mRNA-1	89 kDa	0.016504	0.015282	0.014587
Heat shock 70 kDa protein F, mitochondrial	MCOS_0000716401-mRNA-1	69 kDa	0.0072985	0.0041587	0.0073438
Hypothetical protein 13	MCOS_0000148201-mRNA-1	34 kDa	0.020109	0.027929	0.014091
Hypothetical protein 14	MCOS_0000503001-mRNA-1	42 kDa	0.0097527	0.0049255	0.0099406
Hypothetical protein 15	MCOS_0000306101-mRNA-1	12 kDa	0.018275	0	0.02049
Hypothetical protein 16	MCOS_0000636001-mRNA-1	25 kDa	0.018241	0.0076771	0.0092963
JYalpha	MCOS_0000915001-mRNA-1	156 kDa	0.011628	0.011469	0.009211
JYalpha	MCOS_0000471201-mRNA-1	46 kDa	0.0043682	0.0048535	0.003265
Lactate dehydrogenase/glycoside hydrolase, family 4, C-terminal domain; Lactate/malate dehydrogenase, C-terminal domain-containing protein	MCOS_0000494501-mRNA-1	18 kDa	0.047759	0.03216	0.034481
L-lactate dehydrogenase	MCOS_0000344301-mRNA-1	40 kDa	0.016325	0.0097806	0.024225
L-lactate dehydrogenase	MCOS_0000355001-mRNA-1	36 kDa	0.0043286	0	0.0080886
Low-density lipoprotein (LDL) receptor class A repeat; Immunoglobulin subtype 2 domain; Immunoglobulin subtype domain; Immunoglobulin-like domain; Immunoglobulin I-set domain; Immunoglobulin-like fold domain-containing protein	MCOS_0000952201-mRNA-1	74 kDa	0.0054937	0.004578	0.0076994
Lysosomal alpha-glucosidase	MCOS_0000562501-mRNA-1	100 kDa	0.036019	0.023345	0.035523
Lysosome-associated membrane glycoprotein family-containing protein	MCOS_0000063101-mRNA-1	25 kDa	0.009426	0.010182	0
Major vault protein	MCOS_0000563301-mRNA-1	97 kDa	0.039384	0.040689	0.028663
Major vault protein	MCOS_0000378001-mRNA-1	43 kDa	0.015816	0.029289	0.013908
Myosin, essential light chain	MCOS_0001027601-mRNA-1	19 kDa	0.10328	0.085457	0.10471
NAD-dependent malic enzyme, mitochondrial	MCOS_0000337801-mRNA-1	48 kDa	0.028126	0.034467	0.030143
NAD-dependent malic enzyme, mitochondrial	MCOS_0000090701-mRNA-1	62 kDa	0.0089229	0.012393	0.013101
NAD-dependent malic enzyme, mitochondrial	MCOS_0000307601-mRNA-1	15 kDa	0.026932	0.029924	0.030195
Nucleoside diphosphate kinase	MCOS_0000737601-mRNA-1	21 kDa	0.015242	0.022933	0.012461
Paramyosin	MCOS_0000199801-mRNA-1	105 kDa	0.029032	0.030877	0.026025
Peptidyl-prolyl cis-trans isomerase	MCOS_0000073201-mRNA-1	21 kDa	0.034113	0.017548	0.023019
Phosphoglucomutase, putative	MCOS_0000589301-mRNA-1	98 kDa	0.016632	0.016526	0.016297
Pol-related	MCOS_0000869101-mRNA-1	70 kDa	0.0034005	0.0015743	0.0015886
Probable citrate synthase, mitochondrial	MCOS_0000096401-mRNA-1	48 kDa	0.072949	0.088795	0.055139
Probable elongation factor 1-gamma	MCOS_0000633401-mRNA-1	45 kDa	0.0063477	0.010915	0.0050835
Probable GDP-L-fucose synthase	MCOS_0000135001-mRNA-1	34 kDa	0.0034552	0	0.0075327
Probable ornithine aminotransferase, mitochondrial	MCOS_0000348201-mRNA-1	46 kDa	0.01478	0.01288	0.01056
Profilin family-containing protein	MCOS_0000656601-mRNA-1	9 kDa	0.019899	0.02211	0.029748
Protein CPN-2	MCOS_0000966301-mRNA-1	21 kDa	0.04336	0.057603	0.056365
Protein TKT-1	MCOS_0001022801-mRNA-1	46 kDa	0.015424	0.011108	0.020817
Purine nucleoside phosphorylase	MCOS_0000177901-mRNA-1	25 kDa	0.031012	0.022972	0.050707
Putative adp,ATP carrier protein	MCOS_0000147501-mRNA-1	35 kDa	0	0.0041587	0.0041964
Putative collagen alpha-1(V) chain	MCOS_0000075001-mRNA-1	146 kDa	0.0048371	0.0033591	0.0045195
Putative cuticle collagen 75	MCOS_0000075201-mRNA-1	122 kDa	0.014395	0.0081018	0.016878
Putative cuticle collagen 75	MCOS_0000028401-mRNA-1	127 kDa	0.010639	0.0075777	0.012489
Putative sodium/potassium-transporting ATPase subunit beta	MCOS_0000188301-mRNA-1	24 kDa	0.0083689	0	0.0046916
Putative tubulin alpha chain	MCOS_0000377601-mRNA-1	50 kDa	0.013502	0.012501	0.0074205
Spectrin alpha chain	MCOS_0000252201-mRNA-1	282 kDa	0.0033861	0.0070883	0.0048143
Spectrin beta chain	MCOS_0000671401-mRNA-1	271 kDa	0.0018283	0.0028214	0.0014235
Succinate dehydrogenase [ubiquinone] flavoprotein subunit, mitochondrial	MCOS_0000543801-mRNA-1	71 kDa	0.012714	0.015354	0.013944
Thioredoxin	MCOS_0000870901-mRNA-1	12 kDa	0.040171	0.024796	0.031277
Transitional endoplasmic reticulum ATPase	MCOS_0000368601-mRNA-1	91 kDa	0.017036	0.023863	0.019998
Translation elongation factor EFG, V domain; Elongation factor, GTP-binding domain; Translation elongation factor EFTu/EF1A, domain 2; Small GTP-binding protein domain; Translation elongation factor EFG/EF2, domain IV; Translation protein, beta-barrel domain; Elongation factor G, III-V domain; Ribosomal protein S5 domain 2-type fold, subgroup; Ribosomal protein S5 domain 2-type fold; P-loop conta…	MCOS_0000931901-mRNA-1	96 kDa	0.0024731	0.0041981	0.0026958
Translationally-controlled tumor protein homolog	MCOS_0000688101-mRNA-1	20 kDa	0.010412	0.019282	0.01362
Triosephosphate isomerase	MCOS_0000845201-mRNA-1	27 kDa	0.026533	0.031391	0.037185
Tubulin alpha-4A chain	MCOS_0000436001-mRNA-1	50 kDa	0.0087363	0.011031	0.011131
Tubulin beta-1 chain	MCOS_0000026501-mRNA-1	49 kDa	0.0041361	0.0053616	0
Tubulin beta-2 chain	MCOS_0000740801-mRNA-1	50 kDa	0.014521	0.027638	0.013568
UTP--glucose-1-phosphate uridylyltransferase	MCOS_0000901501-mRNA-1	57 kDa	0.002826	0	0.0085812
1 According to the Wellcome Trust Sanger Institute database (http://www.sanger.ac.uk/resources/downloads/helminths/; 01/29/2015 version).
2 Tetrathyridium somatic extract and its replicates are indicated and the NSAF values are shown for each detected protein.
